# Supplementary material for: TrmB, a tRNA m7G46 methyltransferase, plays a role in hydrogen peroxide resistance and positively modulates the translation of katA and katB mRNAs in Pseudomonas aeruginosa
Source: PubMed Central journal article supplement — Nucleic Acids Res. 2019 Aug 20;47(17):9271–81. doi: 10.1093/nar/gkz702 (PMC6755087; doi:10.1093/nar/gkz702), 2019-08-20
Supplement: gkz702_supplemental_file.pdf [file gkz702_supplemental_file.pdf]

## SUPPLEMENTARY DATA

### **TrmB, a tRNA m<sup>7</sup>G46 methyltransferase, plays a role in hydrogen peroxide resistance and positively modulates the translation of *katA* and *katB* mRNAs in *Pseudomonas aeruginosa***

Narumon Thongdee<sup>1</sup>, Juthamas Jaroensuk<sup>1,2</sup>, Sopapan Atichartpongkul<sup>3</sup>, Jurairat Chittrakanwong<sup>1</sup>, Kamonchanok Chooyoung<sup>1</sup>, Thanyaporn Srimahaeak<sup>1</sup>, Pimchai Chaiyen<sup>2</sup>, Paiboon Vattanaviboon<sup>1,3</sup>, Skorn Mongkolsuk<sup>1,3</sup>, and Mayuree Fuangthong<sup>1,3,\*</sup>

<sup>1</sup>Applied Biological Sciences Program, Chulabhorn Graduate Institute, Chulabhorn Royal Academy, Bangkok, Thailand

<sup>2</sup>School of Biomolecular Sciences and Engineering, Vidyasirimedhi Institute of Science and Technology, Rayong, Thailand

<sup>3</sup>Laboratory of Biotechnology, Chulabhorn Research Institute, Bangkok, Thailand

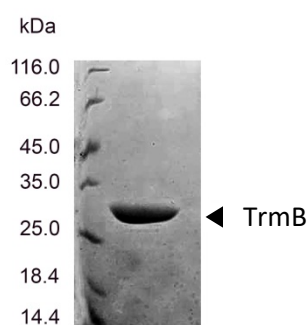

**Figure S1 SDS-PAGE analysis of the purified PaTrmB protein (27 kDa).** The purity of the PaTrmB was estimated to be >99% on a Coomassie blue stained SDS-polyacrylamide gel.

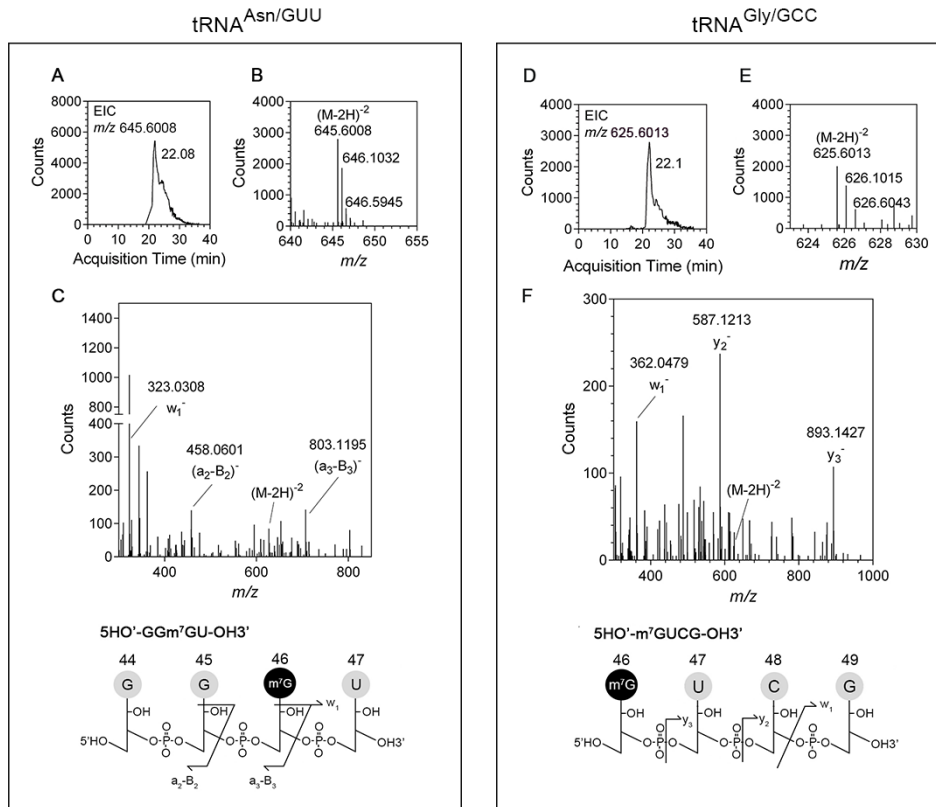

**Figure S2 The PaTrmB catalyzes the formation of m<sup>7</sup>G at position 46 in variable loop of tRNA<sup>Asn/GUU</sup> and tRNA<sup>Gly/GCC</sup> *in vitro*.** (A) Extracted ion chromatogram of GGm<sup>7</sup>GU with  $m/z$  645.6008; this fragment is an RNase A digested product of tRNA<sup>Asn/GUU</sup>. (B) The mass spectrum of GGm<sup>7</sup>GU fragment shows a doubly-charged negative ion with  $m/z$  645.6008. (C) CID spectrum and CID fragmentation pattern of  $m/z$  645.6008 with  $w_1$ ,  $a_2-B_2$ , and  $a_3-B_3$  ion products. (D) Extracted ion chromatogram of m<sup>7</sup>GUCC with  $m/z$  625.6013; this fragment is an RNase T1 digested product of tRNA<sup>Gly/GCC</sup>. (E) The mass spectrum of m<sup>7</sup>GUCC fragment shows a doubly-charged negative ion with  $m/z$  625.6013. (F) CID spectrum and CID fragmentation pattern of  $m/z$  625.6013 with  $w_1$ ,  $y_2$ , and  $y_3$  ion products.

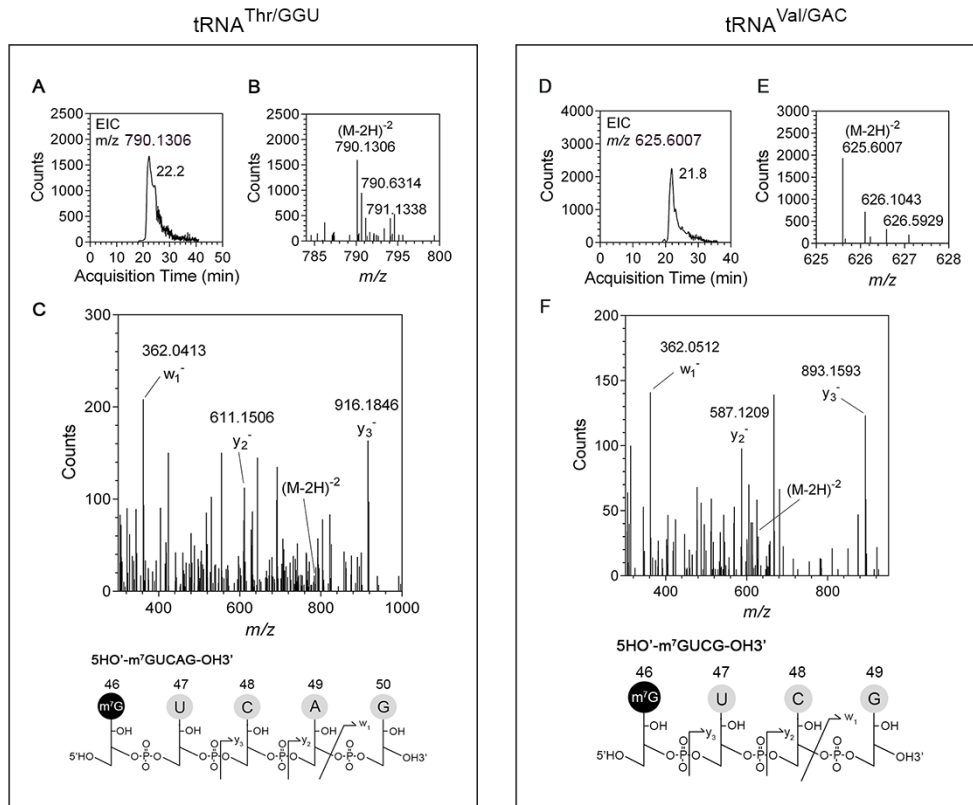

**Figure S3** The PaTrmB catalyzes the formation of  $m^7G$  at position 46 in variable loop of  $tRNA^{Thr/GGU}$ , and  $tRNA^{Val/GAC}$  *in vitro*. **(A)** Extracted ion chromatogram of  $m^7GUCAG$  with  $m/z$  790.1306; this fragment is an RNase T1 digested product of  $tRNA^{Thr/GGU}$ . **(B)** The mass spectrum of  $m^7GUCAG$  fragment shows a doubly-charged negative ion with  $m/z$  790.1306. **(C)** CID spectrum and CID fragmentation pattern of  $m/z$  790.1306 with  $w_1$ ,  $y_2$ , and  $y_3$  ion products. **(D)** Extracted ion chromatogram of  $m^7GUCG$  fragment with  $m/z$  625.6007; this fragment is an RNase T1 digested product of  $tRNA^{Val/GAC}$ . **(E)** The mass spectrum of  $m^7GUCG$  fragment shows a doubly-charged negative ion with  $m/z$  625.6007. **(F)** CID spectrum and CID fragmentation pattern of  $m/z$  625.6007 with  $w_1$ ,  $y_2$ , and  $y_3$  ion products.

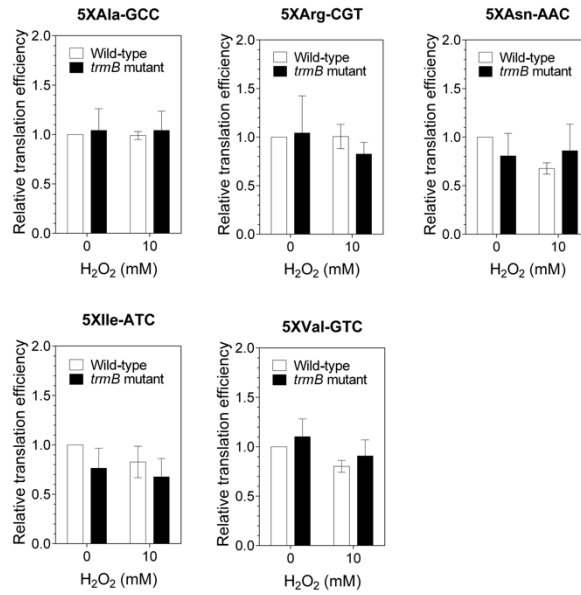

**Figure S4** Relative translation efficiency of 5XAla-GCC, 5XArg-CGT, 5XAsn-AAC, 5XIle-ATC, and 5XVal-GTC reporter in the wild type and *trmB* mutant strains upon H<sub>2</sub>O<sub>2</sub> exposure. Data represent the mean ± SD for four biological replicates.

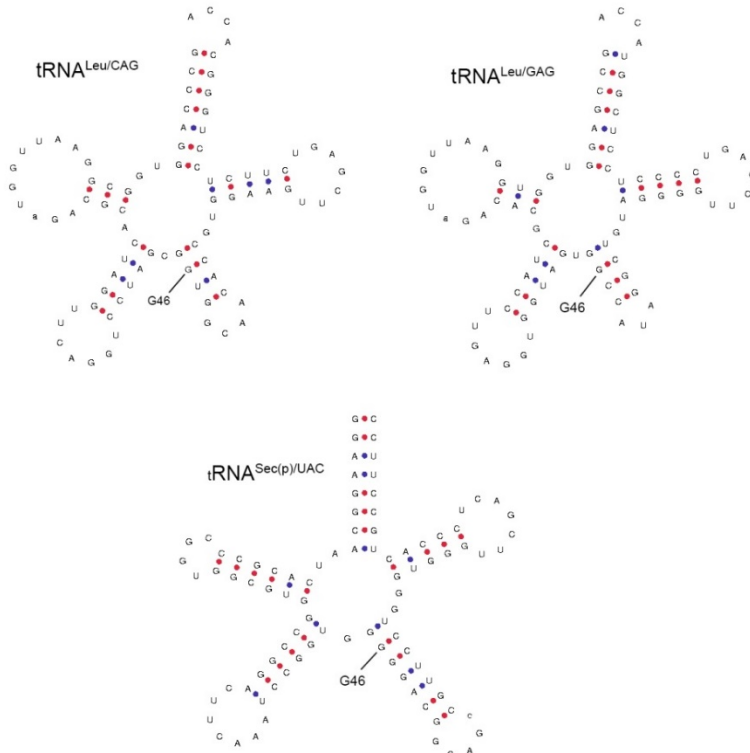

**Figure S5** Predicted secondary structure of tRNA<sup>Leu/CAG</sup>, tRNA<sup>Leu/GAG</sup>, and tRNA<sup>Sec(p)/UAC</sup>. tRNA database: <http://gtrnadb2009.ucsc.edu/>

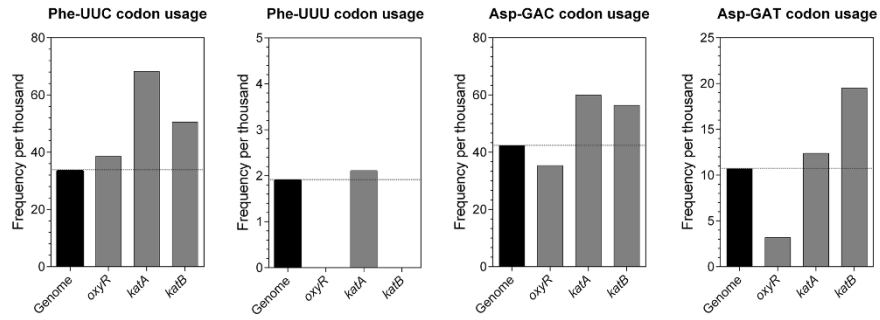

**Figure S6** *katA* and *katB* are enriched in codons decoded by tRNA<sup>Phe/GAA</sup> and tRNA<sup>Asp/GUC</sup> compared to the full genome. **(A)** Usage of the Phe-UUC codon in H<sub>2</sub>O<sub>2</sub>-defense genes. **(B)** Usage of the Phe-UUU codon in H<sub>2</sub>O<sub>2</sub> defensive genes. **(C)** Usage of the Asp-GAC codon in H<sub>2</sub>O<sub>2</sub> defensive genes. **(D)** Usage of the Asp-GAU codon in H<sub>2</sub>O<sub>2</sub> defensive genes. Codon usage database: <https://www.kazusa.or.jp/codon/>

**Table S1** Strains and plasmids used in this study

| Strain/plasmid            | Characteristic                                                                                                                                      | Reference/source                 |
|---------------------------|-----------------------------------------------------------------------------------------------------------------------------------------------------|----------------------------------|
| <i>P. aeruginosa</i> PA14 |                                                                                                                                                     |                                  |
| Wild type                 | <i>P. aeruginosa</i> UCBPP-PA14 wild type strain                                                                                                    | ATCC                             |
| <i>trmB</i> mutant        | <i>trmB</i> mutant::pKNOCK-Gm,Gm <sup>r</sup>                                                                                                       | This study                       |
| <i>trmB</i> complemented  | <i>trmB</i> harboring pBBR1MCS-4/ <i>trmB</i> _FL                                                                                                   | This study                       |
| <i>E. coli</i>            |                                                                                                                                                     |                                  |
| BW20767                   | <i>leu-63::IS10recA1creC510 hsdR17 endA1zbf-5uidA(ΔMluI)::pir<sup>+</sup>thi</i><br>RP4-2-tet::Mu-1kan::Tn7                                         | Metcalf, <i>et al.</i> ,<br>1996 |
| DH5α                      | λ <sup>-</sup> φ80d <i>lacZ</i> ΔM15 <i>recA1 endA1gyrA96thi-1hsdR17(rk<sup>-</sup>mk<sup>+</sup>)</i><br><i>supE44relA1deoR Δ(lacZYA-argF)U169</i> | Stratagene Inc.<br>(USA)         |
| DE3 (BL21)                | <i>E. coli</i> B F- <i>dcm ompT hsdS</i> ( <sub>FB-MB</sub> ) <i>galA</i> (DE3)                                                                     | Stratagene Inc.<br>(USA)         |
| Plasmids                  |                                                                                                                                                     |                                  |
| pKNOCK-Gm                 | Suicide plasmid for insertional inactivation of <i>trmB</i>                                                                                         | (22)                             |
| pKN- <i>trmB</i>          | pKNOCK-Gm with internal 215-bp fragment of <i>trmB</i>                                                                                              | This study                       |
| pBBR1MCS-4                | Broad-host-range plasmid for <i>trmB</i> expression                                                                                                 | (23)                             |
| pBB- <i>trmB</i> -FL      | pBBR1MCS-4 expressing PA14 TrmB                                                                                                                     | This study                       |
| pBB- <i>katB</i> -6XHis   | pBBR1MCS-4 expressing His-tagged KatB                                                                                                               | This study                       |
| pETBLUE-2                 | Vector for protein expression                                                                                                                       | This study                       |
| pET- <i>trmB</i> -FL      | pETBLUE-2 expressing C-terminal His tagged TrmB                                                                                                     | This study                       |
| pET- <i>katB</i> -FL      | pETBLUE-2 carrying C-terminal His tagged KatB                                                                                                       | This study                       |
| pPR9TT                    | <i>lacZ</i> translational fusion vector                                                                                                             | Novagen                          |
| pPR-ATG-control           | pPR9TT expressing β-galactosidase                                                                                                                   | This study                       |
| pPR-5XGln-CAA             | pPR9TT expressing 5XGln fragment fused in-frame with <i>lacZ</i>                                                                                    | This study                       |
| pPR-5XAla-GCC             | pPR9TT expressing 5XAla fragment fused in-frame with <i>lacZ</i>                                                                                    | This study                       |
| pPR-5XArg-CGU             | pPR9TT expressing 5XArg fragment fused in-frame with <i>lacZ</i>                                                                                    | This study                       |
| pPR-5XAsn-AAC             | pPR9TT expressing 5XAsn fragment fused in-frame with <i>lacZ</i>                                                                                    | This study                       |
| pPR-5XAsp-GAC             | pPR9TT expressing 5XAsp fragment fused in-frame with <i>lacZ</i>                                                                                    | This study                       |
| pPR-5XIle-AUC             | pPR9TT expressing 5XIle fragment fused in-frame with <i>lacZ</i>                                                                                    | This study                       |
| pPR-5XPhе-UUC             | pPR9TT expressing 5XPhе fragment fused in-frame with <i>lacZ</i>                                                                                    | This study                       |
| pPR-5XThr-ACC             | pPR9TT expressing 5XThr fragment fused in-frame with <i>lacZ</i>                                                                                    | This study                       |
| pPR-5XVal-GUC             | pPR9TT expressing 5XVal fragment fused in-frame with <i>lacZ</i>                                                                                    | This study                       |
| pPR-5XPhе-UUU             | pPR9TT expressing 5XPhе-UUU fragment fused in-frame with <i>lacZ</i>                                                                                | This study                       |

**Table S2** Primers and synthesized oligonucleotides used in this study

| Name     | Sequence                                                                                                    | Application                                                                                        |
|----------|-------------------------------------------------------------------------------------------------------------|----------------------------------------------------------------------------------------------------|
| BT4381_F | ACTGAGCGATGAGGTTTCAGG                                                                                       | Amplification of <i>trmB</i> fragment for pKN- <i>trmB</i> cloning and semi-qRT PCR fo <i>trmB</i> |
| BT4382_R | AGCTATACACCCGCACGTTG                                                                                        |                                                                                                    |
| BT4767_F | TTTCCATGAGCGATACCCCG                                                                                        | Amplification of <i>trmB</i> full-length for pBB- <i>trmB</i> _FL clonning                         |
| BT4768_R | GGAAACGTGCAGCTTGAAGG                                                                                        |                                                                                                    |
| BT5330_F | GGCCCATGGGCACCGTGAAGAGCT                                                                                    | Amplification of <i>trmB</i> full-length for pET- <i>trmB</i> _FL clonning                         |
| BT5331_R | GGTCTCGAGGTCGATGCGCTCGAA                                                                                    |                                                                                                    |
| BT5468   | GGATCCTAATACGACTCACTATAGGGGGGGCTATAGCTCAGCTGGGAGAGCG<br>CTTGCATGGCATGCAAGAGGTCGACGGTTCGATCCCGTCTAGCTCCACCA  | PCR template for the amplification of dsDNA encoded for tRNA <sup>Ala/GGC</sup>                    |
| BT6974   | GGATCCTAATACGACTCACTATAGGGGGGGCCATAGCTCAGCTGGGAGAGC<br>GCCTGCTTTGCACGCAGGAGGTCAGGAGTTCGATCCTCCTTGGCTCCACCA  | PCR template for the amplification of dsDNA encoded fortRNA <sup>Ala/TGC</sup>                     |
| BT5469   | GGATCCTAATACGACTCACTATAGGGGGTTCGATAGCTCAGCCTGGTAGAGC<br>AACCATCCACGAAATGGTCTGTGCGGGTTCGACTCCCGCTCGAACGT     | PCR template for the amplification of dsDNA encoded fortRNA <sup>Arg/ACG</sup>                     |
| BT6948   | GGATCCTAATACGACTCACTATAGGGGCATCCGTAGCTCAGCTGGATAGAGT<br>ACTGCCCTCCGAAGGCAGGGGTGCGTGGTTCGAATCCCGCCGGATGCGCCA | PCR template for the amplification of dsDNA encoded fortRNA <sup>Arg/CCG</sup>                     |
| BT6949   | GGATCCTAATACGACTCACTATAGGGGTCCCGGTAGCTCAATTGGATAGAGC<br>ATCCCCTCCTAAGGGGAAGGTTGGAGGTTGACCCCTCTCCGGGACGCCA   | PCR template for the amplification of dsDNA encoded fortRNA <sup>Arg/CCT</sup>                     |
| BT6950   | GGATCCTAATACGACTCACTATAGGGGCGCCCGTAGCTCAGCTGGATAGAGC<br>ATCCGCCTTCTAAGCGGATGGTGCAGGTTGAGTCTGCCGGGTGCGCCA    | PCR template for the amplification of dsDNA encoded fortRNA <sup>Arg/TCT</sup>                     |
| BT5470   | GGATCCTAATACGACTCACTATAGGGTCCGCGATAGCTCAGTCGGTAGAGCA<br>AATGACTGTTAATCATTGGGTCCCTGGTTCGAGTCCAGGTCGCGGAGCCA  | PCR template for the amplification of dsDNA encoded fortRNA <sup>Asn/GTT</sup>                     |
| BT5471   | GGATCCTAATACGACTCACTATAGGGGCAGCGGTAGTTCAGTCGGTTAGAAT<br>ACCGGCCTGTACAGCCGGGGTTCGCGGGTTCGAGTCCCGTCCGCTGCGCCA | PCR template for the amplification of dsDNA encoded fortRNA <sup>Asp/GTC</sup>                     |
| BT6951   | GGATCCTAATACGACTCACTATAGGGGGCTGAGTAGCAGAGTGGTTATGCAC<br>CGGATTGCAAATCCGTGAACGCCGGTTCGATTCCGACCTCAGCCTCCA    | PCR template for the amplification of dsDNA encoded fortRNA <sup>Cys/GCA</sup>                     |
| BT7242   | GGATCCTAATACGACTCACTATAGGGAGGGGCGTCGCCAAGCGGTAAGGCA<br>GCAGTTTTGATCCTGCCATGCGTTGGTTCGAATCCAGCCGCCCTGCCA     | PCR template for the amplification of dsDNA encoded fortRNA <sup>Gln/TTG</sup>                     |
| BT5089   | GGATCCTAATACGACTCACTATAGGGGTCCCCTTCGTCTAGTGGCCTAGGAC<br>ACCGCCCTTTACGGCGGTAACAGGGGTTGAGTCCCTAGGGGACGCCA     | PCR template for the amplification of dsDNA encoded fortRNA <sup>Glu/TTC</sup>                     |
| BT6952   | GGATCCTAATACGACTCACTATAGGGGCGGGCGTCGTATAATGGCATTACCT<br>GAGCTTCCAAGCTCATGACGAGGTTGATTCCCTTCGCCCGCTCCA       | PCR template for the amplification of dsDNA encoded fortRNA <sup>Gly/CCC</sup>                     |
| BT5472   | GGATCCTAATACGACTCACTATAGGGGCGGGAATAGCTCAGTTGGTAGAGCA<br>CGACCTTGCCAAGGTCGGGGTCGCGAGTTCGAGTCTCGTTTCCCCTCCA   | PCR template for the amplification of dsDNA encoded fortRNA <sup>Gly/GCC</sup>                     |
| BT6953   | GGATCCTAATACGACTCACTATAGGGGCGGGTATAGTTTCAAGTGGTAGAGCCT<br>CAGCCTTCCAAGCTGATGCGGGTTCGATTCCCGCTACCCGCTCCA     | PCR template for the amplification of dsDNA encoded fortRNA <sup>Gly/TCC</sup>                     |
| BT7244   | GGATCCTAATACGACTCACTATAGGGGTGGGCGTAGCTCAGTTGGTAGAGCA<br>CAGGATTGTGGCTCCTGGTGTGCGTGGGTTGATTCCCATCGTCCACCCCA  | PCR template for the amplification of dsDNA encoded fortRNA <sup>His/GTG</sup>                     |

**Table S2** Primers and synthesized oligonucleotides used in this study (cont.)

| Name   | Sequence                                                                                                                      | Application                                                                       |
|--------|-------------------------------------------------------------------------------------------------------------------------------|-----------------------------------------------------------------------------------|
| BT5473 | GGATCCTAATACGACTCACTATAGGGGGTCTGTAGCTCAGTTGGTTAGAGC<br>GCACCCCTGATAAGGGTGAGGTCCGCAGTTCGAATCTGCCAGACCCACCA                     | PCR template for the amplification of dsDNA encoded fortRNA <sup>Ile/GAT</sup>    |
| BT6954 | GGATCCTAATACGACTCACTATAGGGGCCTCGGTGGCGGAATCGGTAGACGC<br>GGCGGATTCAAAATCCGTTTCTGGCGACAGAGTGAGAGTTCGAGTCTCTCCC<br>GAGGCACCA     | PCR template for the amplification of dsDNA encoded fortRNA <sup>Leu/CAA</sup>    |
| BT7246 | GGATCCTAATACGACTCACTATAGGGGCCAGGTGGCGGAATTGGTAGACGC<br>ACTAGGTTCAAGTCTAGCGGTGGCAACACCGTGGAAGTTCGAGTCTTCTCC<br>TGGGCACCA       | PCR template for the amplification of dsDNA encoded fortRNA <sup>Leu/CAG</sup>    |
| BT6955 | GGATCCTAATACGACTCACTATAGGGGCCAGGTGGTGGGAATTGGTAGACAC<br>GCTACCTTGAGGTGGTAGTGGCCATAGGCTGTAGGGGTTTCGAGTCCCCTCCT<br>CGGTACCA     | PCR template for the amplification of dsDNA encoded fortRNA <sup>Leu/GAG</sup>    |
| BT7248 | GGATCCTAATACGACTCACTATAGGGGCGGACGTGGTGGGAATTGGTAGACAC<br>ACTGGATTTAGGTTCCAGCGCCGCAAGGCGTGAGAGTTCGAGTCTCTCCGTC<br>CGCACCA      | PCR template for the amplification of dsDNA encoded fortRNA <sup>Leu/TAG</sup>    |
| BT5091 | GGATCCTAATACGACTCACTATAGGGGGTCTGTTAGCTCAGTCGGTAGAGCA<br>GTTGGCTTTTAACCAATTGGTCGTAGGTTTCGAATCCTACAGACCCACCA                    | PCR template for the amplification of dsDNA encoded fortRNA <sup>Lys/TTT</sup>    |
| BT5092 | GGATCCTAATACGACTCACTATAGGGCGCGGGATGGAGCAGTCTGGTAGCTC<br>GTCGGGCTCATAACCCGAAGGTCGTTGGTTCAAATCCAGCTCCCGCAACCA                   | PCR template for the amplification of dsDNA encoded fortRNA <sup>Met/CAT</sup>    |
| BT5474 | GGATCCTAATACGACTCACTATAGGGGCCAGGTAGCTCAGTTGGTAGAGCA<br>GGGGATTGAAAATCCCGTGTCCGGCGGTTTCGATTCCGTCCTGGGCACCA                     | PCR template for the amplification of dsDNA encoded fortRNA <sup>Phe/GAA</sup>    |
| BT7250 | GGATCCTAATACGACTCACTATAGGGCGGAGCGTAGCGCAGCTTGGTAGCGC<br>GTCTCGTTCGGGACGAGAAGGTCGCTGGTTCGAATCCAGTCGCTCCGACCA                   | PCR template for the amplification of dsDNA encoded fortRNA <sup>Pro/CGG</sup>    |
| BT7252 | GGATCCTAATACGACTCACTATAGGGCGGGGCGTAGCGCAGCCTGGTAGCG<br>CACTTGCATGGGGTGCAAGGGGTCGAGTGTTTCGAATCACTCCGTCCTCCGACCA                | PCR template for the amplification of dsDNA encoded fortRNA <sup>Pro/GGG</sup>    |
| BT7254 | GGATCCTAATACGACTCACTATAGGGCGGGGTATAGCGCAGTCCGGTAGCGC<br>GCCTGCTTTGGGAGCAGGATGTCGGGAGTTCGAATCTCTTACCCCGACCA                    | PCR template for the amplification of dsDNA encoded fortRNA <sup>Pro/TGG</sup>    |
| BT6956 | GGATCCTAATACGACTCACTATAGGGGGAAGGCAATCACGCCCGGTGGCGTG<br>GCCGGACTTCAAATCCGGTGGGGGACGGCAGCCGTTCTGGGTGGGTTTCGA<br>CTCCACTGCCTTCC | PCR template for the amplification of dsDNA encoded fortRNA <sup>Sec(p)/TCA</sup> |
| BT6957 | GGATCCTAATACGACTCACTATAGGGGGAGAGATGCCGGAGTGGTCCAACG<br>GGACGGATTGCAAATCCGTTGAGTCAGCAATGGCTCCTAGGGTTCAAATCCC<br>TATCTCTCCGCCA  | PCR template for the amplification of dsDNA encoded fortRNA <sup>Ser/CGA</sup>    |
| BT6958 | GGATCCTAATACGACTCACTATAGGGGGAGAGGTGGCCGAGTGGCCGAAGG<br>CGCTCCCCTGCTAAGGAGTACACCTCAAAGGGTGTCCGGGGTTTCGAATCC<br>CCCCCTCTCCGCCA  | PCR template for the amplification of dsDNA encoded fortRNA <sup>Ser/GCT</sup>    |



**Table S2** Primers and synthesized oligonucleotides used in this study (cont.)

| Name   | Sequence                                                                                                                      | Application                                                                    |
|--------|-------------------------------------------------------------------------------------------------------------------------------|--------------------------------------------------------------------------------|
| BT6959 | GGATCCTAATACGACTCACTATAGGGGGTGTAGGTGTCCGAGTGGTTGAAGGA<br>GCACGCCTGAAAAGTGTGTATACGGGAAACCGTATCGAGGGTTCGAATCCCT<br>CCCTCACCGCCA | PCR template for the amplification of dsDNA encoded fortRNA <sup>Ser/GGA</sup> |
| BT7256 | GGATCCTAATACGACTCACTATAGGGGGAGGTGTGGCCGAGTGGTTTAAGGC<br>AACGGTCTTGAAAACCGTCGAAGGGGAGACTCTTCCGTGAGTTCGAATCTCA<br>CCGCCTCCGCCA  | PCR template for the amplification of dsDNA encoded fortRNA <sup>Ser/TGA</sup> |
| BT6960 | GGATCCTAATACGACTCACTATAGGGGCCGGATTAGCTCAGTCGGTAGAGCA<br>GCTCATTCGTAATGAGAAGGTCGGGGTTCGATTCTCTATCCGGCACCA                      | PCR template for the amplification of dsDNA encoded fortRNA <sup>Thr/CGT</sup> |
| BT5475 | GGATCCTAATACGACTCACTATAGGGGGCTCATGTAGCTCAGTTGGTAGAGCA<br>CACCTTGGTAAGGGTGTAGGTCAGCGGTTCAAATCCGCTCATGAGCTCCA                   | PCR template for the amplification of dsDNA encoded fortRNA <sup>Thr/GGT</sup> |
| BT6961 | GGATCCTAATACGACTCACTATAGGGGCCGGTATAGCTCAGCTGGTAGAGCA<br>ACTGACTTGTAAATCAGTAGGTCCCGGGTTCGACTCCTGGTGCCGGCACCA                   | PCR template for the amplification of dsDNA encoded fortRNA <sup>Thr/TGT</sup> |
| BT5090 | GGATCCTAATACGACTCACTATAGGGAGGCCAGTAGCTCAATTGGCAGAGCG<br>GCGGTCTCCAAAACCGCAGGTTGGGGTTCGATTCCCTCCTGGCCTGCCA                     | PCR template for the amplification of dsDNA encoded fortRNA <sup>Trp/CCA</sup> |
| BT6962 | GGATCCTAATACGACTCACTATAGGGGGAGGGATTCCCGAGTGGCCAAAGGG<br>ATCAGACTGTAAATCTGACGTCATAGACTTCGAAGGTTCAATCCTTCTCCCT<br>CCACCA        | PCR template for the amplification of dsDNA encoded fortRNA <sup>Tyr/GTA</sup> |
| BT5476 | GGATCCTAATACGACTCACTATAGGGAGGCACGTAGCTCAGTTGGTTAGAGC<br>ACCACCTTGACATGGTGGGGTTCGTTGGTTCGAATCCAATCGTGCCTACCA                   | PCR template for the amplification of dsDNA encoded fortRNA <sup>Val/GAC</sup> |
| BT5477 | GGATCCTAATACGACTCACTATAGGGGGTGTAGGTGTCCGAGTGGTTGAAGGA<br>TCTGCCTTACAAGCAGAGGGTTCGGCGGTTTCGATCCCGTCATCACCCACCA                 | PCR template for the amplification of dsDNA encoded fortRNA <sup>Val/TAC</sup> |
| BT5478 | GGATCCTAATACGACTCACTATAGGG                                                                                                    | Forward primer for amplification of all dsDNA templates                        |
| BT5501 | TGGTGGAGCTAGACGGGATC                                                                                                          | Reverse primer for amplification of tRNA <sup>Ala/GGC</sup>                    |
| BT6963 | TGGTGGAGCCAAGGAGGATC                                                                                                          | Reverse primer for amplification of tRNA <sup>Ala/TGC</sup>                    |
| BT5502 | ACGTTTCGAGCGGGAGTCGAA                                                                                                         | Reverse primer for amplification of tRNA <sup>Arg/ACG</sup>                    |
| BT6964 | TGGCGCATCCGGCGGGATTC                                                                                                          | Reverse primer for amplification of tRNA <sup>Arg/CCG</sup>                    |
| BT6965 | TGGCGTCCCGGAGAGGGGTC                                                                                                          | Reverse primer for amplification of tRNA <sup>Arg/CCT</sup>                    |
| BT6966 | TGGCGCACCCGGCAGGACTC                                                                                                          | Reverse primer for amplification of tRNA <sup>Arg/TCT</sup>                    |
| BT5503 | TGGCTCCGCGACCTGGACTC                                                                                                          | Reverse primer for amplification of tRNA <sup>Asn/GTT</sup>                    |
| BT5504 | TGGCGCAGCGGACGGGACTC                                                                                                          | Reverse primer for amplification of tRNA <sup>Asp/GTC</sup>                    |
| BT6967 | TGGAGGCTGAGGTCGGAATC                                                                                                          | Reverse primer for amplification of tRNA <sup>Cys/GCA</sup>                    |
| BT7243 | TGGCAGGGGCGGCTGGATTC                                                                                                          | Reverse primer for amplification of tRNA <sup>Gln/TTG</sup>                    |
| BT5093 | TGGCGTCCCTAGGGGACTC                                                                                                           | Reverse primer for amplification of tRNA <sup>Glu/TTT</sup>                    |
| BT6968 | TGGAGCGGGCGAAGGGAATC                                                                                                          | Reverse primer for amplification of tRNA <sup>Gly/CCC</sup>                    |
| BT5505 | TGGAGCGGGAAACGAGACTC                                                                                                          | Reverse primer for amplification of tRNA <sup>Gly/GCC</sup>                    |

**Table S2** Primers and synthesized oligonucleotides used in this study (cont.)

| Name   | Sequence                                     | Application                                                    |
|--------|----------------------------------------------|----------------------------------------------------------------|
| BT6969 | TGGAGCGGGTAGCGGGAATC                         | Reverse primer for amplification of tRNA <sup>Gly/TCC</sup>    |
| BT7245 | TGGGGTGGACGATGGGAATC                         | Reverse primer for amplification of tRNA <sup>His/GTG</sup>    |
| BT5506 | TGGTGGGTCTGGGCAGATTC                         | Reverse primer for amplification of tRNA <sup>Ile/GAT</sup>    |
| BT6970 | TGGTGCCTCGGGAGAGACTC                         | Reverse primer for amplification of tRNA <sup>Leu/CAA</sup>    |
| BT7247 | TGGTGCCAGGAGAAGACTC                          | Reverse primer for amplification of tRNA <sup>Leu/CAG</sup>    |
| BT6971 | TGGTACCGAGGAGGGGACTC                         | Reverse primer for amplification of tRNA <sup>Leu/GAG</sup>    |
| BT7249 | TGGTGC GGACGGAGAGACTC                        | Reverse primer for amplification of tRNA <sup>Leu/TAG</sup>    |
| BT5095 | TGGTGGGTCTGTAGGATTCG                         | Reverse primer for amplification of tRNA <sup>Lys/TTT</sup>    |
| BT5096 | TGGTTGCGGGAGCTGGATTT                         | Reverse primer for amplification of tRNA <sup>Met/CAT</sup>    |
| BT5507 | TGGTGCCAGGGACGGAATC                          | Reverse primer for amplification of tRNA <sup>Phe/GAA</sup>    |
| BT7251 | TGGTCCGAGCGACTGGATTC                         | Reverse primer for amplification of tRNA <sup>Pro/CGG</sup>    |
| BT7253 | TGGTCCGGACGGAGTGATTC                         | Reverse primer for amplification of tRNA <sup>Pro/CGG</sup>    |
| BT7255 | TGGTCCGGGTAGAGAGATTC                         | Reverse primer for amplification of tRNA <sup>Pro/TGG</sup>    |
| BT6972 | GGAAGGCAGTGGGAGTCGAA                         | Reverse primer for amplification of tRNA <sup>Sec(p)/TCA</sup> |
| BT6973 | TGGCGGAGAGATAGGGATTT                         | Reverse primer for amplification of tRNA <sup>Ser/CGA</sup>    |
| BT6974 | TGGCGGAGAGGGGGGATTC                          | Reverse primer for amplification of tRNA <sup>Ser/GCT</sup>    |
| BT6975 | TGGCGGTGAGGGAGGGATTC                         | Reverse primer for amplification of tRNA <sup>Ser/GGA</sup>    |
| BT7257 | TGGCGGAGGCGGTGAGATTC                         | Reverse primer for amplification of tRNA <sup>Ser/TGA</sup>    |
| BT6976 | TGGTGCCGGATAGAGGAATC                         | Reverse primer for amplification of tRNA <sup>Thr/CGT</sup>    |
| BT5508 | TGGAGCTCATGAGCGGATTT                         | Reverse primer for amplification of tRNA <sup>Thr/GGT</sup>    |
| BT6977 | TGGTGCCGGCACCAGGATC                          | Reverse primer for amplification of tRNA <sup>Thr/TGT</sup>    |
| BT5094 | TGGCAGGCCAGGAGGGAATC                         | Reverse primer for amplification of tRNA <sup>Trp/CCA</sup>    |
| BT6978 | TGGTGGAGGGAGAAGGATTC                         | Reverse primer for amplification of tRNA <sup>Tyr/GTA</sup>    |
| BT5509 | TGGTAGGCACGATTGGATTC                         | Reverse primer for amplification of tRNA <sup>Val/GAC</sup>    |
| BT5510 | TGGTGGGTGATGACGGGATC                         | Reverse primer for amplification of tRNA <sup>Val/TAC</sup>    |
| BT7258 | ATCCCCCGGGCTGCAGGAATTCGATATCAACATCTCGAGACTC  | Control fragment without codon bias                            |
| BT7259 | GAGTCTCGAGATGTTGATATCGAATTCCTGCAGCCCGGGGGAT  |                                                                |
| BT7260 | ATCCCCCGGGCTGCATTGTTGTTGTTGTTGCATCTCGAGACTC  | Experimental fragment with 5XGln-CAA                           |
| BT7261 | GAGTCTCGAGATGCAACAACAACAATGCAGCCCGGGGGAT     |                                                                |
| BT5970 | ATCCCCCGGGCTGCAGGCGGCGGGCGGGCCATCTCGAGACTC   | Experimental fragment with 5XAla-GCC                           |
| BT5971 | GAGTCTCGAGATGGCCGCGCCCGCCCTGCAGCCCGGGGGAT    |                                                                |
| BT5972 | ATCCCCCGGGCTGCAACGACGACGACGACGCATCTCGAGACTC  | Experimental fragment with 5XArg-CGU                           |
| BT5973 | GAGTCTCGAGATGCGTCGTCGTCGTTGCAGCCCGGGGGAT     |                                                                |
| BT5974 | ATCCCCCGGGCTGCAGTTGTTGTTGTTGTTTCATCTCGAGACTC | Experimental fragment with 5XAsn-AAC                           |
| BT5975 | GAGTCTCGAGATGAACAACAACAACACTGCAGCCCGGGGGAT   |                                                                |
| BT5976 | ATCCCCCGGGCTGCAGTCGTCGTCGTCGTCATCTCGAGACTC   | Experimental fragment with 5XAsp-GAC                           |
| BT5977 | GAGTCTCGAGATGGACGACGACGACTGCAGCCCGGGGGAT     |                                                                |



**Table S3** Ribonucleosides identified by LC-MS/MS analysis of *P. aeruginosa* PA14 tRNA

| rN Name                            | Precursor ion (m/z) | Product ion (m/z) | Fragment (V) | Collision (V) | Retention time (min) | Signal intensity normalized to $\Sigma$ AUCG |                  |                    |                  |                          |                  |
|------------------------------------|---------------------|-------------------|--------------|---------------|----------------------|----------------------------------------------|------------------|--------------------|------------------|--------------------------|------------------|
|                                    |                     |                   |              |               |                      | Wild type                                    |                  | <i>trmB</i> mutant |                  | <i>trmB</i> complemented |                  |
|                                    |                     |                   |              |               |                      | Mean                                         | SD               | Mean               | SD               | Mean                     | SD               |
| Cm                                 | 258                 | 112               | 380          | 8             | 5.1                  | 0.004845966                                  | 0.0002401        | 0.005756626        | 0.0002153        | 0.006072198              | 0.000335         |
| m <sup>3</sup> C                   | 258                 | 126               | 380          | 8             | 2.2                  | -                                            | -                | -                  | -                | -                        | -                |
| m <sup>5</sup> C                   | 258                 | 126               | 380          | 8             | 2.7                  | 1.90826E-05                                  | 1.294E-06        | 2.04589E-05        | 4.996E-06        | 2.72853E-05              | 1.58E-05         |
| Um                                 | 259                 | 113               | 380          | 4             | 9.1                  | 8.39385E-05                                  | 8.333E-05        | 0.000204017        | 6.115E-05        | 0.000155449              | 4.409E-05        |
| m <sup>5</sup> U                   | 259                 | 127               | 380          | 8             | 6.3                  | 0.010569546                                  | 0.0007471        | 0.008096794        | 0.0006416        | 0.007937585              | 0.0003169        |
| s <sup>2</sup> U                   | 261                 | 129               | 380          | 8             | 6.3                  | 5.70115E-05                                  | 3.272E-06        | 4.35724E-05        | 3.862E-06        | 4.28974E-05              | 1.043E-06        |
| s <sup>4</sup> U                   | 261                 | 129               | 380          | 8             | 7.9                  | 0.001973445                                  | 0.0003525        | 0.002042688        | 0.000128         | 0.001758821              | 0.0001094        |
| l                                  | 269                 | 137               | 380          | 12            | 6.2                  | 0.002223452                                  | 2.898E-05        | 0.037350303        | 0.0011602        | 0.036179178              | 0.0011242        |
| mo <sup>5</sup> U                  | 275                 | 143               | 380          | 4             | 7.3                  | 1.70892E-06                                  | 3.513E-07        | 9.76926E-07        | 1.841E-07        | 9.98527E-07              | 2.321E-07        |
| Am                                 | 282                 | 136               | 380          | 16            | 12.4                 | 0.000851609                                  | 0.0002882        | 0.000748527        | 0.0002474        | 0.000797983              | 0.0001581        |
| m <sup>1</sup> A                   | 282                 | 150               | 380          | 16            | 2.9                  | 3.51548E-05                                  | 3.796E-05        | 1.60471E-05        | 1.578E-06        | 1.43217E-05              | 7.197E-06        |
| m <sup>2</sup> A                   | 282                 | 150               | 380          | 16            | 11.5                 | 0.03199429                                   | 0.00093568       | 0.033155675        | 0.0019178        | 0.029919588              | 0.0034706        |
| m <sup>6</sup> A                   | 282                 | 150               | 380          | 16            | 16.2                 | 0.011258614                                  | 0.0007696        | 0.009094374        | 0.0002814        | 0.007364891              | 0.001638         |
| mnm <sup>5</sup> U                 | 288                 | 156               | 380          | 10            | 1.6                  | 3.21294E-05                                  | 1.801E-06        | 3.09328E-05        | 4.002E-06        | 3.01965E-05              | 3.889E-06        |
| m <sup>6</sup> 2A                  | 296                 | 164               | 380          | 16            | 20.4                 | 6.7303E-05                                   | 1.306E-05        | 4.94945E-05        | 6.018E-06        | 6.52538E-05              | 5.463E-05        |
| Gm                                 | 298                 | 152               | 380          | 8             | 15                   | 0.003787192                                  | 0.0002225        | 0.003011863        | 0.0002998        | 0.003073118              | 0.0004603        |
| <b>m<sup>7</sup>G</b>              | <b>298</b>          | <b>166</b>        | <b>380</b>   | <b>12</b>     | <b>5.1</b>           | <b>0.038565559</b>                           | <b>0.0003676</b> | <b>0.001360776</b> | <b>0.0005876</b> | <b>0.018155591</b>       | <b>0.0018724</b> |
| m <sup>1</sup> G                   | 298                 | 166               | 380          | 12            | 15                   | 0.009522496                                  | 0.0014462        | 0.006761964        | 0.0008228        | 0.007100262              | 0.0016468        |
| m <sup>2</sup> <sub>2</sub> G      | 312                 | 180               | 380          | 8             | 19.5                 | -                                            | -                | -                  | -                | -                        | -                |
| cmo <sup>5</sup> U                 | 319                 | 187               | 380          | 8             | 6.5                  | -                                            | -                | -                  | -                | -                        | -                |
| cmnm <sup>5</sup> U                | 332                 | 125               | 380          | 18            | 1.6                  | 6.62787E-06                                  | 2.861E-06        | 4.31408E-06        | 3.235E-07        | 1.08442E-05              | 4.697E-06        |
| i <sup>6</sup> A                   | 336                 | 204               | 380          | 16            | 22.4                 | 0.000653115                                  | 0.0001341        | 0.000476001        | 4.662E-05        | 0.000548744              | 3.849E-05        |
| cmnm <sup>5</sup> s <sup>2</sup> U | 348                 | 216               | 380          | 20            | 3.7                  | -                                            | -                | -                  | -                | -                        | -                |
| t <sup>6</sup> A                   | 413                 | 136               | 380          | 8             | 21.9                 | 0.004719937                                  | 0.0001347        | 0.002769214        | 0.000313         | 0.002728713              | 0.0002978        |
